# Supplementary material for: Research on the Thickness and Microstructure of Plate-like TiO2 by the Nanosheet-Seeding Growth Technique
Source: MDPI journal article supplement (doi:10.3390/coatings12111673), 2022-11-04
Supplement: s1 [file s1]

# Supplementary Materials: Research on the Thickness and Microstructure of Plate-like TiO<sub>2</sub> by the Nanosheet-Seeding Growth Technique

Yanyan Zhang <sup>1,†</sup>, Hao Liu <sup>1,†</sup>, Junyan Cui <sup>1</sup>, Xiaosong Bai <sup>1</sup>, Daoyuan Yang <sup>1</sup>, Huiyu Yuan <sup>1,2,\*</sup> and Baoming Wang <sup>3,\*</sup>

<sup>1</sup> Henan Key Laboratory of High Temperature Functional Ceramics, School of Materials Science and Engineering, Zhengzhou University, Zhengzhou 450001, China

<sup>2</sup> Henan Institute of Product Quality Supervision and Inspection, Zhengzhou 450014, China

<sup>3</sup> School of Ecology and Environment, Zhengzhou University, Zhengzhou 450001, China

\* Correspondence: hyyuan@zzu.edu.cn (H.Y.); baomingwang@zzu.edu.cn (B.W.)

† These authors contributed equally to this work.

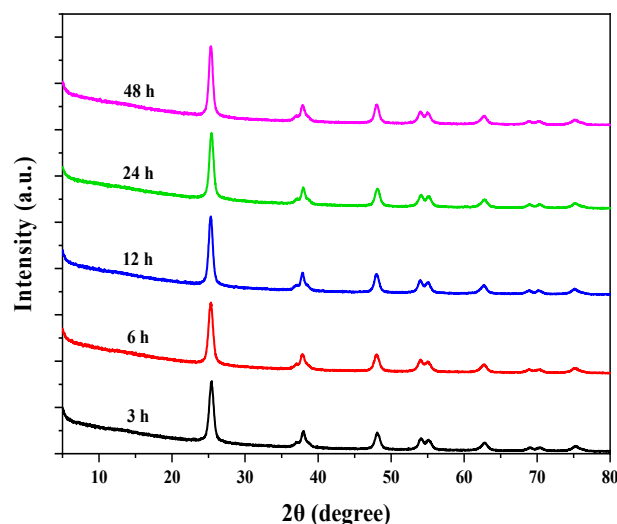

**Figure S1.** XRD of the samples with different synthesis time, 3 h, 6 h, 12 h, 24 h and 48h.

**Citation:** Zhang, Y.; Liu, H.; Cui, J.; Bai, X.; Yang, D.; Yuan, H.; Wang, B. Research on the Thickness and Microstructure of Plate-like TiO<sub>2</sub> by the Nanosheet-Seeding Growth Technique. *Coatings* **2022**, *12*, 1673. <https://doi.org/10.3390/coatings12111673>

Academic Editor: Alexandru Enesca

Received: 13 September 2022

Accepted: 2 November 2022

Published: 4 November 2022

**Publisher's Note:** MDPI stays neutral with regard to jurisdictional claims in published maps and institutional affiliations.

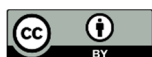

**Copyright:** © 2022 by the authors. Licensee MDPI, Basel, Switzerland. This article is an open access article distributed under the terms and conditions of the Creative Commons Attribution (CC BY) license (<https://creativecommons.org/licenses/by/4.0/>).

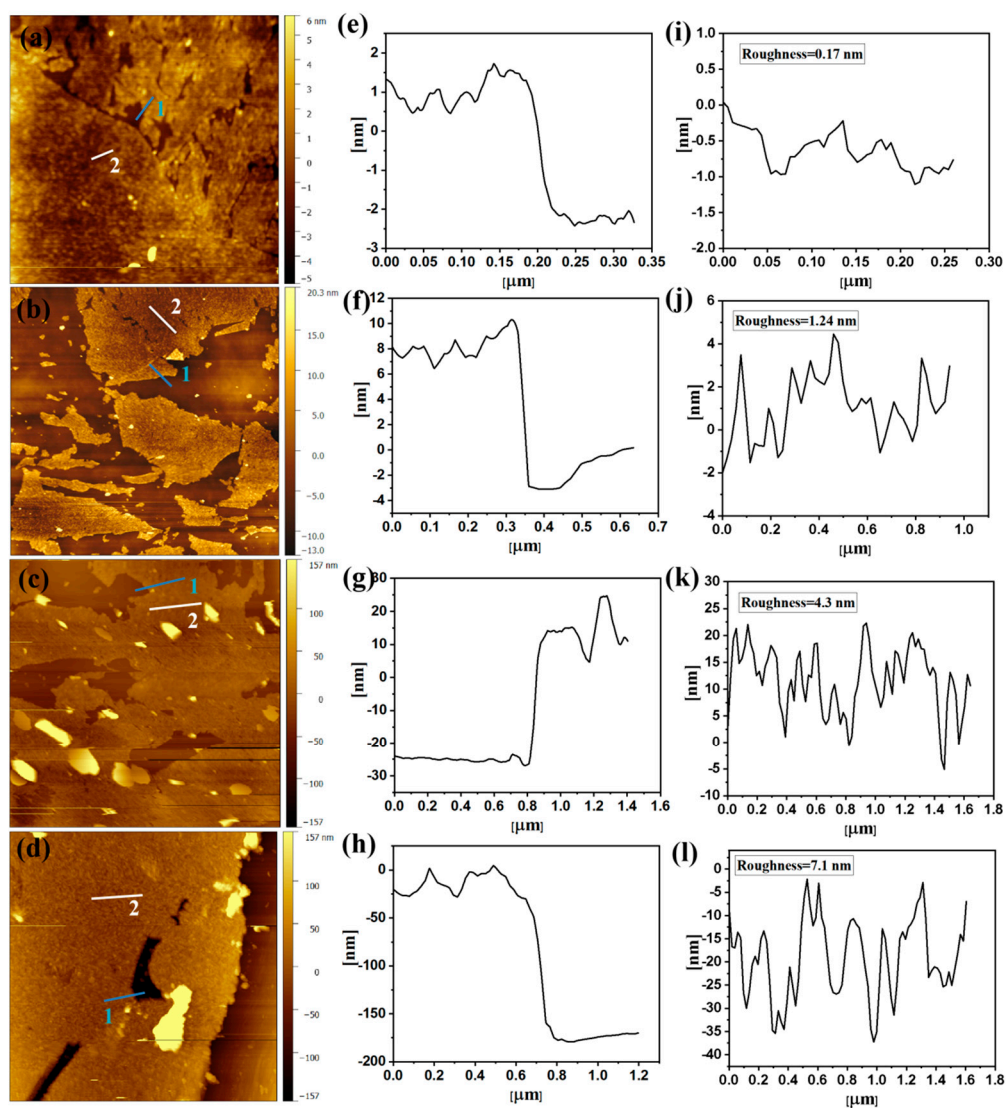

**Figure S2.** AFM images of TiO<sub>2</sub> growth on monolayer T<sub>0.87</sub>O<sub>2</sub> nanosheet thin film, (a) 2 h, (b) 4 h, (c) 8 h and (d) 16 h.

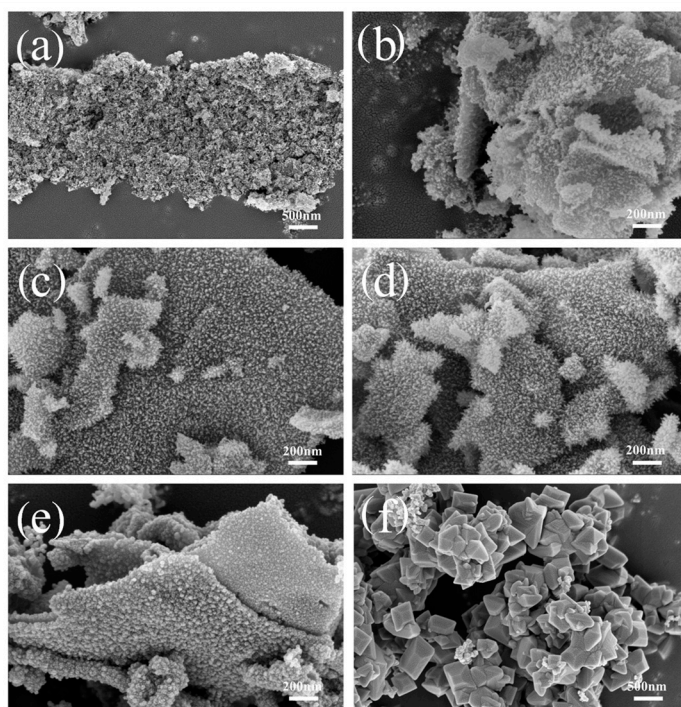

**Figure S3.** Typical SEM images of the samples, (a) 0.025 M, (b) 0.05 M, (c) 0.1 M, (d) 0.15 M and (e) 0.2 M; (f) SEM image of the sample at 0.3 M after calcination.

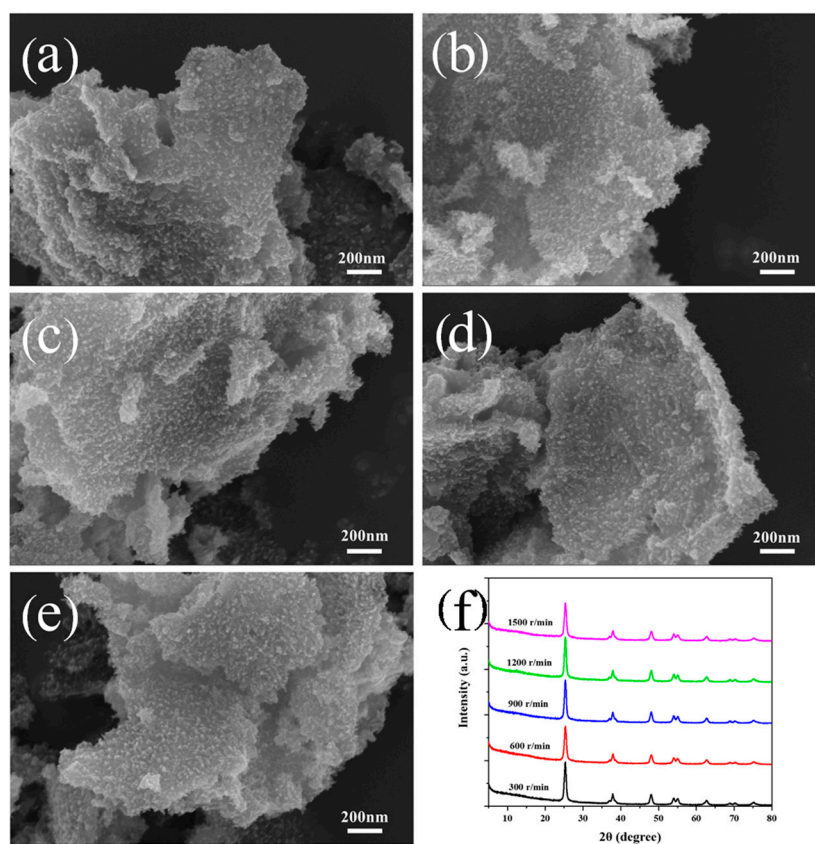

**Figure S4.** SEM images of the samples with different stirring rates, (a) 300 rpm, (b) 600 rpm, (c) 900 rpm, (d) 1200 rpm and (e) 1500 rpm; (f) XRD patterns of the samples.

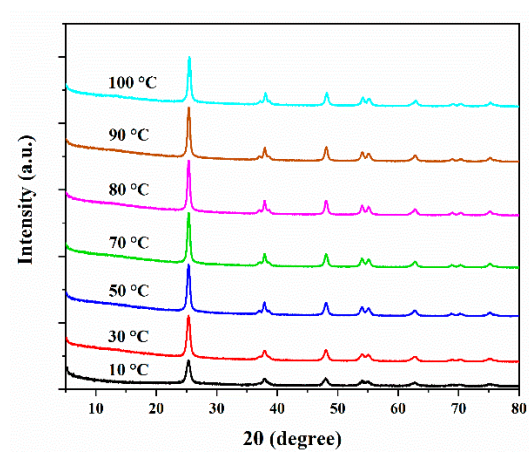

**Figure S5.** XRD of the samples with different synthesis temperatures, 10 °C, 30 °C, 50 °C, 70 °C, 80 °C, 90 °C and 100 °C.
